# Supplementary material for: Portable ultrasound technologies for estimating gestational age in pregnant women: a scoping review and analysis of commercially available models
Source: HighWire-hosted journal article supplement (doi:10.1136/bmjopen-2022-065181), 2022-11-01
Supplement: bmjopen-2022-065181supp005_data_supplement.pdf [file bmjopen-2022-065181supp005_data_supplement.pdf]

**SUPPLEMENTARY TABLE S5.** Search terms used to identify portable ultrasound devices via Google searches

| Portable device specific   | Ultrasound manufacturers and distributors |
|----------------------------|-------------------------------------------|
| Portable ultrasound device | Ultrasound manufacturers                  |
| Handheld ultrasound device | Ultrasound distributors                   |
| Compact ultrasound device  | Ultrasound companies                      |
| Wireless ultrasound device | Ultrasound developers                     |
|                            | Medical supplies manufacturers            |
|                            | Medical supplies distributors             |
|                            | Medical supplies companies                |
|                            | Medical device companies                  |
|                            | Medical device developers                 |
