# Supplementary material for: Portable ultrasound technologies for estimating gestational age in pregnant women: a scoping review and analysis of commercially available models
Source: HighWire-hosted journal article supplement (doi:10.1136/bmjopen-2022-065181), 2022-11-01
Supplement: bmjopen-2022-065181supp006_data_supplement.pdf [file bmjopen-2022-065181supp006_data_supplement.pdf]

**SUPPLEMENTARY TABLE S6.** List of manufacturers’ websites searched for portable devices

| Manufacturer     |
|------------------|
| Butterfly        |
| General Electric |
| Healcerion       |
| Konted           |
| Lequio           |
| Mindray          |
| Phillips         |
| Primedix         |
| Samsung          |
| Siemens          |
| Signostics       |
| SONON            |
| Sonoscanner      |
| SonoScape        |
| SonoSite         |
| Sony             |
| Toshiba          |
| Whale imaging    |
