# Supplementary material for: Portable ultrasound technologies for estimating gestational age in pregnant women: a scoping review and analysis of commercially available models
Source: HighWire-hosted journal article supplement (doi:10.1136/bmjopen-2022-065181), 2022-11-01
Supplement: bmjopen-2022-065181supp007_data_supplement.pdf [file bmjopen-2022-065181supp007_data_supplement.pdf]

**SUPPLEMENTARY TABLE S7.** Codes for each parameter extracted from eligible studies

| Type of study                               | Population                            | Setting                                    |
|---------------------------------------------|---------------------------------------|--------------------------------------------|
| Systematic review                           | Pregnant women - Ectopic pregnancy    | Inpatient facility                         |
| Randomised controlled trial                 | Pregnant women - Vaginal bleed        | Outpatient facility                        |
| Cohort study - Prospective or retrospective | Pregnant women – Trauma               | Both inpatient and outpatient facility     |
| Cross-sectional study                       | Pregnant women - Caesarean section    | Community                                  |
| Case-control study                          | Pregnant women - High risk (multiple) | Home-based                                 |
| Other primary research design               | Pregnant women - Pre-eclampsia        | Population-based                           |
|                                             | Pregnant women – Malaria              | Both outpatient and community              |
|                                             | Pregnant women – multiple             | Multiple                                   |
|                                             | Pregnant women – Schistosomiasis      | Other                                      |
|                                             | Pregnant women – all                  | Unspecified                                |
|                                             | Staff members – physicians            | Telemedicine                               |
|                                             | Staff members - nurses/midwives       |                                            |
|                                             | Staff members - medical students      |                                            |
|                                             | Staff members – combination           |                                            |
|                                             |                                       |                                            |
| Intervention                                | Stage of pregnancy                    | Classification of study objective          |
| Abdominal ultrasound                        | Antenatal – unspecified               | Fetal characteristics / gestational dating |
| Transvaginal ultrasound                     | Antenatal - first trimester           | Routine scans or observation               |
| Abdominal and Transvaginal ultrasound       | Antenatal - second trimester          | Pregnancy confirmation                     |
|                                             | Antenatal - third trimester           |                                            |

|                              |                                        |                         |
|------------------------------|----------------------------------------|-------------------------|
| Transperineal ultrasound     | Antenatal - second and third trimester | Ectopic pregnancy       |
| Training curriculum          | Intrapartum                            | Genetic screening       |
| Automated systems            | Postpartum                             | Emergency / Trauma      |
| Ultrasound modification      | All periods                            | Placental abnormalities |
| Ultrasound protocol          | Multiple periods                       | Labour progress         |
| Tele-ultrasound              | Unspecified                            | Training program        |
| Health systems strengthening | Antenatal and Intrapartum              |                         |
|                              | Antenatal and Postpartum               |                         |
|                              | Intrapartum and Postpartum             |                         |

<sup>1</sup> Other primary research designs included pilot studies, diagnostic accuracy studies, or field investigation/implementation studies
